# Supplementary material for: Relationship between the dipole moment of self-assembled monolayers incorporated in graphene transistors and device electrical stabilities
Source: Royal Society of Chemistry journal article supplement (doi:10.1039/c7ra03865h), 2017-01-01
Supplement: c7ra03865h1.pdf [file c7ra03865h1.pdf]

## RSC Advances Supporting Information

### Relationship between Dipole Moment of Self-Assembled Monolayers Incorporated in Graphene Transistors and Device Electrical Stabilities

Gwang Mo Ku<sup>1</sup>, Eunho Lee<sup>2</sup>, Boseok Kang<sup>2</sup>, Jung Hun Lee<sup>1</sup>, Kilwon Cho<sup>2</sup>, Wi Hyoung Lee<sup>1, \*</sup>

<sup>1</sup>Department of Organic and Nano System Engineering, Konkuk University, Seoul 143-701, Korea.

<sup>2</sup>Department of Chemical Engineering, Pohang University of Science and Technology, Pohang 790-784, Korea.

**Table S1.** Water contact angle and thickness of the SAMs used in this study.

|                  | Water contact angle (°) | Thickness (Å) <sup>a</sup> |
|------------------|-------------------------|----------------------------|
| SiO <sub>2</sub> | < 5                     | -                          |
| HMDS             | 66                      | 3                          |
| ODTS             | 104                     | 24                         |
| APS              | 50                      | 7                          |
| FDTS             | 107                     | 16                         |

<sup>a</sup> Measured by the ellipsometry.

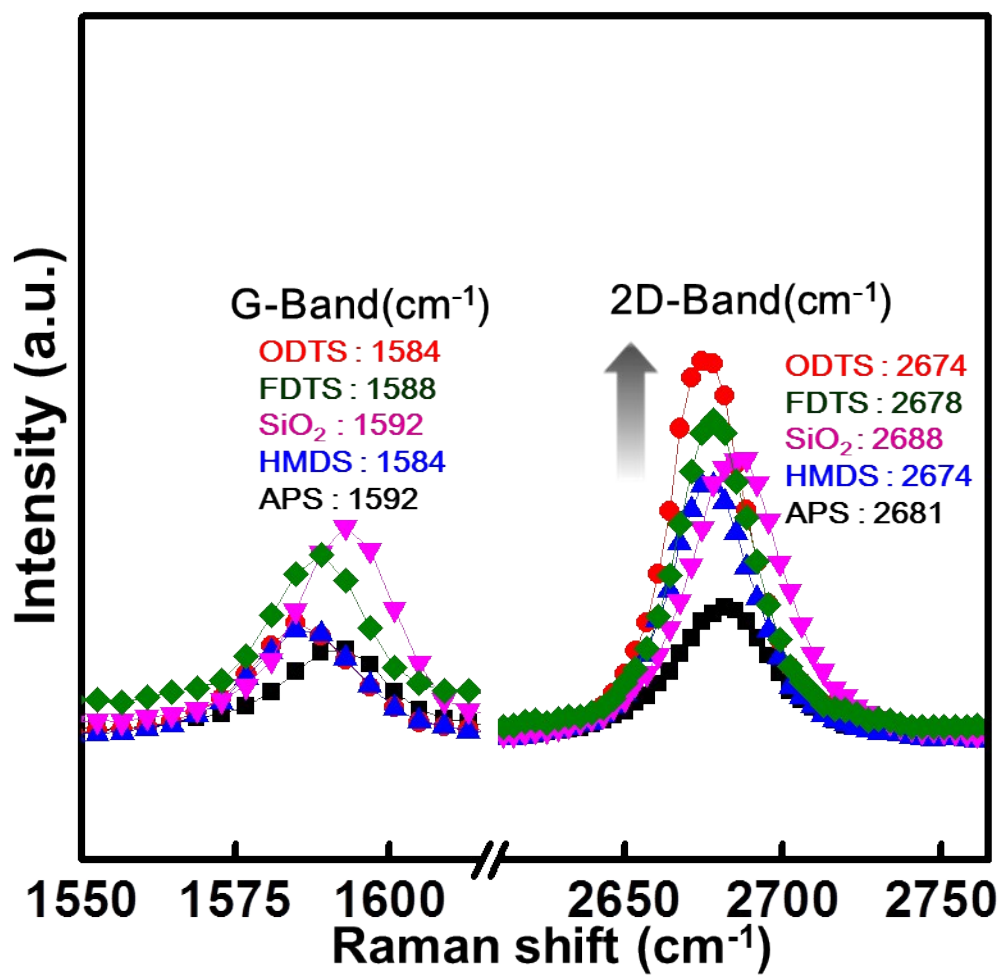

**Figure S1.** Raman spectra of graphene on various SAMs-modified SiO<sub>2</sub>/Si substrates.

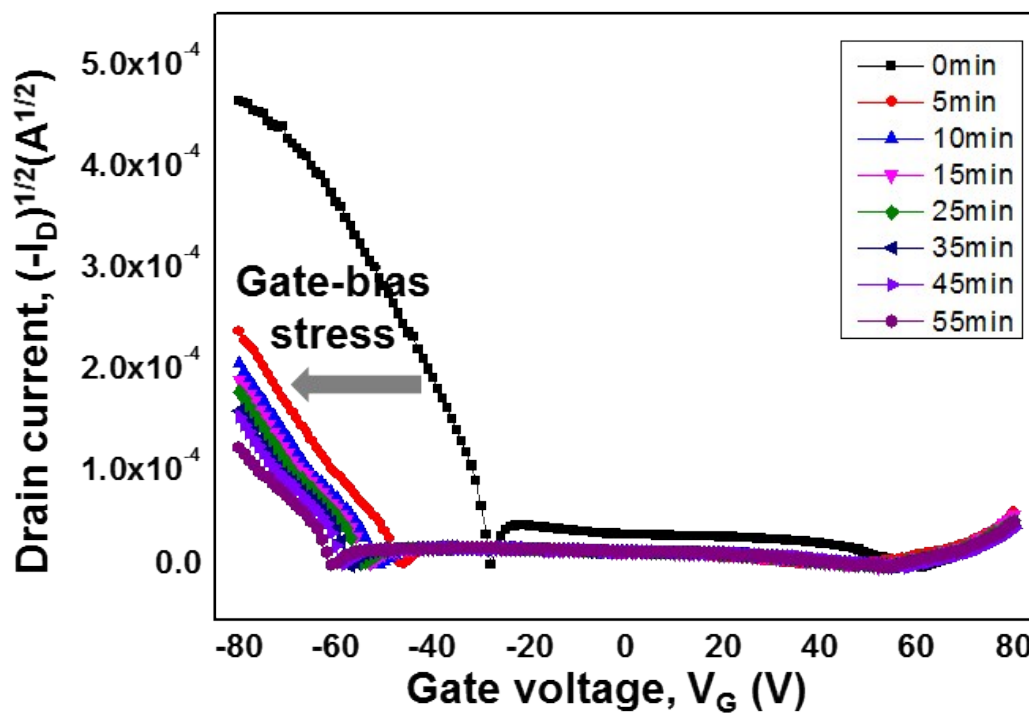

**Figure S2.** Bias stability of pentacene FETs with ODTS SAMs after gate bias stress of -80 V. The transfer curves at the saturation regime ( $V_{SD} = -80$  V) were consecutively obtained at the following time intervals: 0, 5, 10, 15, 25, 35, 45, and 55 min.
